# Supplementary material for: In Vitro Modelling of Osteogenesis Imperfecta with Patient-Derived Induced Mesenchymal Stem Cells
Source: MDPI journal article supplement (doi:10.3390/ijms25063417), 2024-03-18
Supplement: s1 [file s1]

## Supplemental Figures and Tables

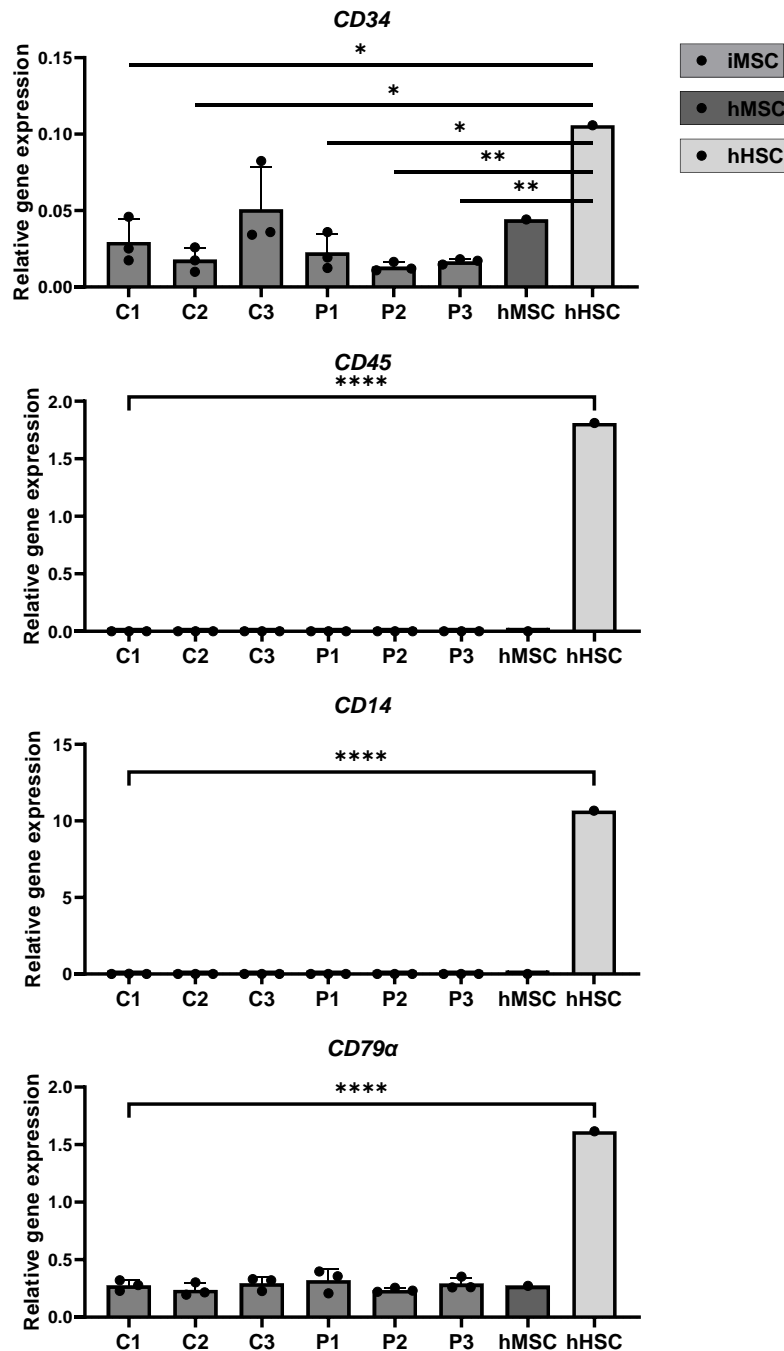

**Figure S1**

Relative gene expression of hematopoietic stem cell (hHSC) markers *CD45*, *CD34*, *CD14* and *CD79α* in healthy controls (C1, C2, C3), OI patients (P1, P2 and P3), primary bone marrow mesenchymal stem cells (hMSC) and primary hematopoietic stem cells (hHSC). Relative gene expression was normalized against *TBP*. Standard deviation (SD) is shown per cell line (n=3), no SD is present for hHSC and hMSC (n=1). Statistical significance is indicated on the graphs (P-values  $\leq 0.05$  (\*),  $\leq 0.01$  (\*\*),  $\leq 0.0001$  (\*\*\*\*)).

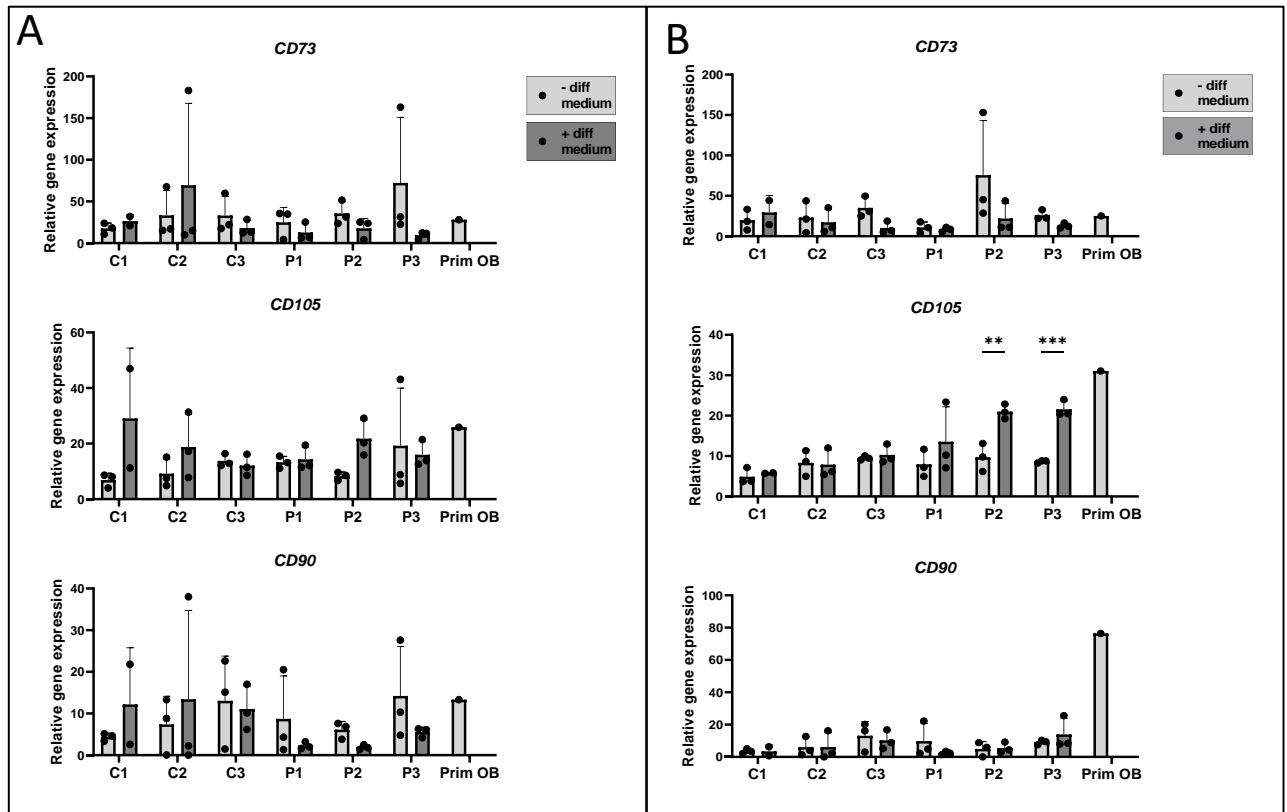

**Figure S2**

Relative gene expression of mesenchymal stem cell markers *CD73*, *CD90* and *CD105* in osteogenic induced and not induced healthy control iMSC (C1, C2, C3), OI patient iMSCs (P1, P2 and P3) and not induced primary osteoblasts (Prim OB) on day 21 (A) and day 28 (B). Relative gene expression was normalized against *TBP*. Standard deviation (SD) is shown per cell line (n=3), no SD is present for Prim OB (n=1). Statistical significance is indicated on the graphs (P-values ≤ 0.01 (\*\*), ≤ 0.001 (\*\*\*)).

**Table S1**

Information about healthy control iPSC (C1, C2, C3) and OI patient iPSC (P1, P2 and P3) cell lines.

| Line | Name    | Genotype     | Pathogenic variant | Sex | Age  | Reprogramming method | Reference                                 | Characterizations                                                                                 |
|------|---------|--------------|--------------------|-----|------|----------------------|-------------------------------------------|---------------------------------------------------------------------------------------------------|
| C1   | Hvs228  | Control      | NA                 | F   | 19 y | Lentivirus           | Nadadur, A. G. <i>et al</i> <sup>46</sup> | Karyotyping, PCR                                                                                  |
| C2   | Hvs420A | Control      | NA                 | M   | 21 y | Lentivirus           | VUi036-A                                  | Staining of OCT3/4, SSEA4, AP, TRA-1-60 and TRA-1-81                                              |
| C3   | Hvs451A | Control      | NA                 | M   | 19 y | Sendai               | VUi032-A                                  | Staining of OCT3/4, SSEA4, TRA-1-60 and TRA-1-81, PCR Sendai and karyotyping                      |
| P1   | Hvs492A | HI OI type I | COL1A1: c.279del T | M   | 38 y | Sendai               | VUi043-A                                  | Staining of OCT3/4, SSEA4, TRA-1-60 and TRA-1-81, and 3 germ layer test (PCR)                     |
| P2   | Hvs459  | DN OI type 3 | COL1A1: c.2299G>A  | F   | 0y   | Sendai               | VUi045-A                                  | Staining of OCT3/4, SSEA4, AP, TRA-1-60 and TRA-1-81, PCR Sendai and 3 germ layer test (staining) |
| P3   | Hvs460  | DN OI type 4 | COL1A1: c.1678G>A  | F   | 0y   | Sendai               | VUi046-A                                  | Staining of OCT3/4, SSEA4, TRA-1-60 and TRA-1-81, PCR Sendai and 3 germ layer test (staining)     |

**Table S2**

Qualitative analysis of alkaline phosphatase (ALP) and Alizarid Red (AR) staining on day 21 and day 28 after osteogenic induction in healthy controls iMSC (C1, C2, C3), OI patients iMSCs (P1, P2 and P3) and hMSCs. ALP and AR stainings were rated by + (some cells are stained), ++ (most/all cells are stained), – (no cells are stained) and x (no cells present).

| <b>Osteoblast differentiation</b> |                |                |               |               |
|-----------------------------------|----------------|----------------|---------------|---------------|
| <b>Cell line</b>                  | <b>ALP D21</b> | <b>ALP D28</b> | <b>AR D21</b> | <b>AR D28</b> |
| <b>C1</b>                         | +              | +              | +             | +             |
| <b>C1</b>                         | ++             | ++             | +             | +             |
| <b>C1</b>                         | ++             | ++             | +             | ++            |
| <b>C2</b>                         | ++             | ++             | +             | +             |
| <b>C2</b>                         | +              | +              | +             | ++            |
| <b>C2</b>                         | +              | +              | -             | -             |
| <b>C3</b>                         | ++             | ++             | -             | -             |
| <b>C3</b>                         | ++             | ++             | -             | ++            |
| <b>C3</b>                         | ++             | x              | -             | x             |
| <b>P1</b>                         | ++             | -              | -             | -             |
| <b>P1</b>                         | ++             | ++             | -             | -             |
| <b>P1</b>                         | ++             | ++             | +             | +             |
| <b>P2</b>                         | +              | +              | +             | +             |
| <b>P2</b>                         | ++             | x              | +             | x             |
| <b>P2</b>                         | x              | ++             | +             | x             |
| <b>P3</b>                         | +              | ++             | -             | +             |
| <b>P3</b>                         | ++             | x              | +             | x             |
| <b>P3</b>                         | +              | ++             | +             | -             |
| <b>hMSC</b>                       | ++             | ++             | ++            | ++            |

**Table S3**

Qualitative analysis of Sudan III staining after adipogenic induction in healthy control iMSC (C1, C2, C3), OI patient iMSCs (P1, P2 and P3) and hMSCs. Morphology is rated by + (large cells with normal nucleus), ++ (large cells with big nucleus) and – (spindle-like cells), while the presence of vesicles is rated by + (some vesicles are present, small), ++ (a lot of vesicles are present, small), +++ (many vesicles are present, big) and – (no vesicles are present).

| <b>Adipogenic differentiation</b> |                   |                 |
|-----------------------------------|-------------------|-----------------|
| <b>Cell line</b>                  | <b>Morphology</b> | <b>Vesicles</b> |
| <b>C1</b>                         | ++                | +               |
| <b>C1</b>                         | ++                | +               |
| <b>C1</b>                         | ++                | +               |
| <b>C2</b>                         | ++                | -               |
| <b>C2</b>                         | ++                | ++              |
| <b>C2</b>                         | +                 | -               |
| <b>C3</b>                         | ++                | ++              |
| <b>C3</b>                         | ++                | ++              |
| <b>C3</b>                         | ++                | ++              |
| <b>P1</b>                         | ++                | ++              |
| <b>P1</b>                         | ++                | ++              |
| <b>P1</b>                         | ++                | ++              |
| <b>P2</b>                         | ++                | ++              |
| <b>P2</b>                         | ++                | ++              |
| <b>P2</b>                         | ++                | +++             |
| <b>P3</b>                         | ++                | -               |
| <b>P3</b>                         | ++                | -               |
| <b>P3</b>                         | ++                | ++              |
| <b>hMSC</b>                       | ++                | +++             |

**Table S4**

Qualitative analysis of Alcian blue staining in healthy controls iMSC (C1, C2, C3) and OI patient iMSCs (P1, P2 and P3) after chondrogenic induction. Staining was rated by + (lightly blue), ++ (blue) and – (no staining). The presence of cell monolayer outgrowth was also noted by + (present) and – (absent).

|           | Alcian blue staining | Cell monolayer outgrowth |
|-----------|----------------------|--------------------------|
| <b>C1</b> | +                    | -                        |
| <b>C1</b> | ++                   | -                        |
| <b>C1</b> | ++                   | -                        |
| <b>C2</b> | +++                  | -                        |
| <b>C2</b> | ++                   | -                        |
| <b>C2</b> | +                    | -                        |
| <b>C3</b> | ++                   | -                        |
| <b>C3</b> | ++                   | -                        |
| <b>C3</b> | ++                   | -                        |
| <b>P1</b> | +                    | -                        |
| <b>P1</b> | ++                   | -                        |
| <b>P1</b> | ++                   | -                        |
| <b>P2</b> | ++                   | -                        |
| <b>P2</b> | ++                   | -                        |
| <b>P2</b> | +                    | -                        |
| <b>P3</b> | +                    | -                        |
| <b>P3</b> | ++                   | -                        |
| <b>P3</b> | ++                   | -                        |

**Table S5**

(a) RT-qPCR analysis qPCR programme

|               | T <sub>m</sub> (°C)  | Time(s)            | Ramp rate (°C/s)         | Cycli      | Analysis Mode  |
|---------------|----------------------|--------------------|--------------------------|------------|----------------|
| Preheat       | 95                   | 10 min             | 4.8                      | 1 ×        | None           |
| PCR           | 95<br>60<br>72<br>78 | 10<br>5<br>10<br>5 | 4.8<br>2.5<br>4.8<br>4.8 | 45x        | Quantification |
| Melting-curve | 95<br><br>60<br>95   | 1<br><br>1         | 4.8<br><br>2,2<br>0,03   | <br><br>1x | Melting curves |
| Cooling       | 40                   | 30                 | 1,5                      | 1×         | None           |

(B) List of primers used in RT-qPCR analysis to measure the relative mRNA expression levels.

| Gene           | Forward               | Reverse                 | Product length (bp) |
|----------------|-----------------------|-------------------------|---------------------|
| <i>ACAN</i>    | GCACCTTTCAGTGTCATTCC  | GTGGTCATAGTTCACCTTGAAGA | 258                 |
| <i>ALP</i>     | AGGGACATTGACGTGATCAT  | CCTGGCTCGAAGAGACC       | 242                 |
| <i>CD105</i>   | CACCACAGCGGAAAAAGGTG  | GCCGGTTTTGGGTATGGGTA    | 335                 |
| <i>CD73</i>    | CTCCTCTCAATCATGCCGCT  | CCCAGGTAATTGTGCCATTGT   | 182                 |
| <i>CD90</i>    | TCCCGAACCAACTTCACCAG  | ATGCCCTCACACTTGACCAG    | 173                 |
| <i>COL10A1</i> | GGGCAGAGGAAGCTTCAGAAA | TCTCAGATGGATTCTGCGTGC   | 73                  |
| <i>COL1A1</i>  | GTGCTAAAGGTGCCAATGGT  | ACCAGGTTACCGCTGTTAC     | 128                 |
| <i>COL2A1</i>  | AGGATGGCTGCACGAAACAT  | GCCATTCAGTGCAGAGTCCT    | 255                 |
| <i>FABP4</i>   | TGACGAAGTCACTGCAGATG  | GAACCTCAGTCCAGGTCAAC    | 217                 |

|                                |                        |                        |     |
|--------------------------------|------------------------|------------------------|-----|
| <i>HNK-1/B3GAT1</i>            | TGGGTTGTGAGTGCTGGTAA   | GTGATGAGCAGAGTCCAGGG   | 116 |
| <i>NANOG</i>                   | AATGGTGTGACGCAGAAGGC   | TGCACCAGGTCTGAGTGTC    | 196 |
| <i>NGFR/p75NT R</i>            | GATCCCTGGCCGTTGGATTA   | TTGCAGCTGTTCCACCTCTG   | 267 |
| <i>OCN/BGLAP</i>               | CACCGAGACACCATGAGAGC   | CTGCTTGGACACAAAGGCTGC  | 132 |
| <i>OCT4</i>                    | CCCACACTGCAGCAGATCA    | ACCACACTCGGACCACATCC   | 70  |
| <i>OPN</i>                     | TTCCAAGTAAGTCCAACGAAAG | GTGACCAGTTCATCAGATTCAT | 181 |
| <i>PAX6</i>                    | AGGTCAGGCTTCGCTAATGG   | TGCTGATTGGTGATGGCTCA   | 97  |
| <i>PPAR<math>\gamma</math></i> | CGACCAGCTGAATCCAGAGT   | GATGCGGATGGCCACCTCTT   | 241 |
| <i>RUNX2</i>                   | CGTGGCCTTCAAGGTGGTAG   | GAGGCATTCCGGAGCTCAG    | 105 |
| <i>SOX2</i>                    | ATGGGTTCGGTGGTCAAGTC   | CTGATCATGTCCCGGAGGTC   | 107 |
| <i>SOX9</i>                    | GGCAAGCTCTGGAGACTTCTG  | CCCGTTCTTCACCGACTTCC   | 138 |
| <i>TBP</i>                     | AGTTCTGGGATTGTACCGCA   | TCCTCATGATTACCGCAGCA   | 139 |
| <i>TFAP2A</i>                  | GACCTCTCGATCCACTCCTTAC | GAGACGGCATTGCTGTTGGACT | 137 |

**Table S6**

List of antibodies and stainings used during flow cytometry analysis of healthy control iNCC (C1, C2, C3) and OI patient iNCC (P1, P2 and P3) cell lines.

| <b>Name</b>                            | <b>Fluorophore</b> | <b>Company</b>  | <b>Catalogue number</b> | <b>Concentration</b> | <b>Clone</b> |
|----------------------------------------|--------------------|-----------------|-------------------------|----------------------|--------------|
| Anti-p75 NGF Receptor antibody [NGFR5] | PE-Cy7             | Abcam           | ab234270                | 1:100                | NGFR5        |
| CD57 Antibody                          | FITC               | Miltenyi Biotec | 130-122-935             | 1:100                | TB03         |
| PAX-6 Antibody, REAfinity™             | APC                | Miltenyi Biotec | 130-123-328             | 1:100                | REA507       |



|                       |           |                                            |            |        |   |
|-----------------------|-----------|--------------------------------------------|------------|--------|---|
| Fixable Viability Dye | eFluor780 | eBioscience,<br>ThermoFisher<br>Scientific | 65-0865-14 | 1:1000 | - |
|-----------------------|-----------|--------------------------------------------|------------|--------|---|

APC allophycocyanin, FITC fluorescein isothiocyanate, PE R-phycoerthrin.
